# Supplementary material for: The iodine–oxygen halogen bond: solid-state structures of 3-iodopropiolamides
Source: Royal Society of Chemistry journal article supplement (doi:10.1039/c5ce00365b), 2015-01-01
Supplement: c5ce00365b1.pdf [file c5ce00365b1.pdf]

## The Iodine-Oxygen Halogen Bond: Solid-state Structures of 3-Iodopropiolamides

Philipp Kratzer, Bastian Ramming, Steven Römisch and Gerhard Maas\*

Institute of Organic Chemistry I, University of Ulm, Albert-Einstein-Allee 11, D-89081 Ulm,  
Germany

### – Electronic Supporting Information –

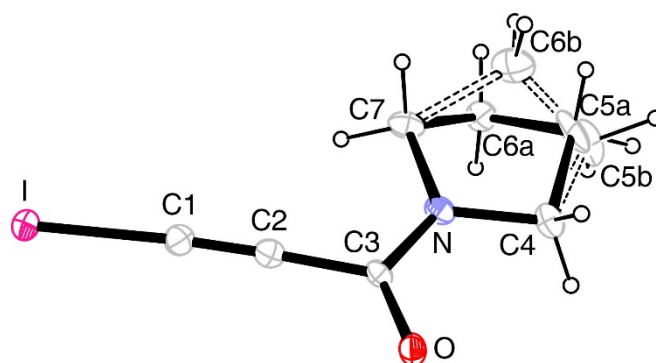

**Fig. S1** Structure of 3-iodopropiolamide **3a** (PK248) in the crystal. Displacement ellipsoids represent a 30% probability. The pyrrolidine ring is conformationally disordered. The positions of C5a/C5b and C6a/C6b and could be resolved; site occupation factors were refined at 0.565/0.435.

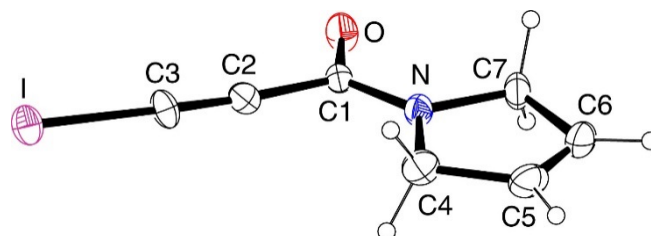

**Fig. S2** Structure of 3-iodopropiolamide **3b** (PK276) in the crystal. Displacement ellipsoids represent a 30% probability.

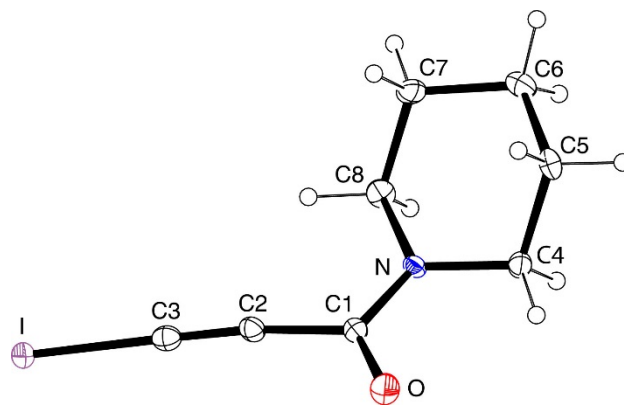

**Fig. S3** Structure of 3-iodopropiolamide **3c** (PK257) in the crystal. Displacement ellipsoids represent a 30% probability.

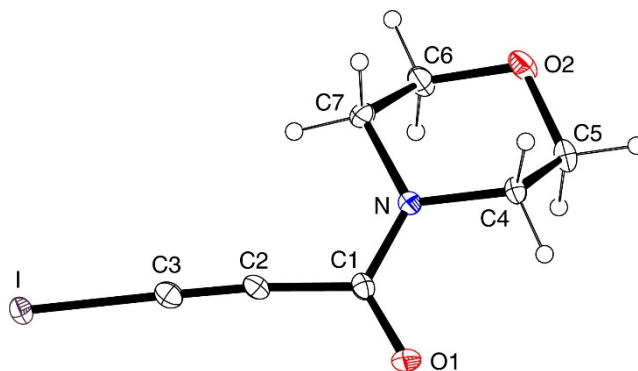

**Fig. S4** Structure of 3-iodopropiolamide **3d** (PK254) in the crystal. Displacement ellipsoids represent a 30% probability.

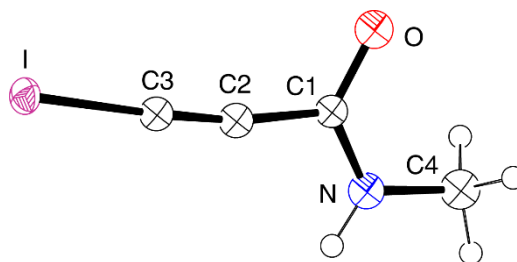

**Fig. S5** Structure of 3-iodopropiolamide **3e** (PK281) in the crystal. Displacement ellipsoids represent a 50% probability.

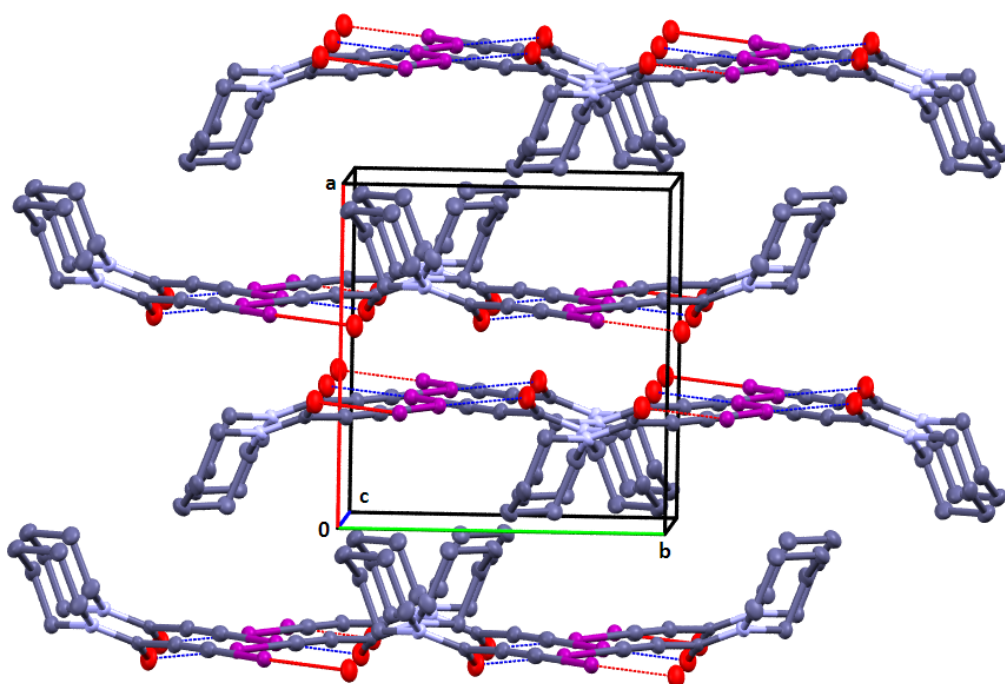

**Fig. S6** Packing diagram of **3c** (PK257) (PK257\_Abs\_packing\_view on ba plane.png). Hanging contacts are shown with red dashed bonds.

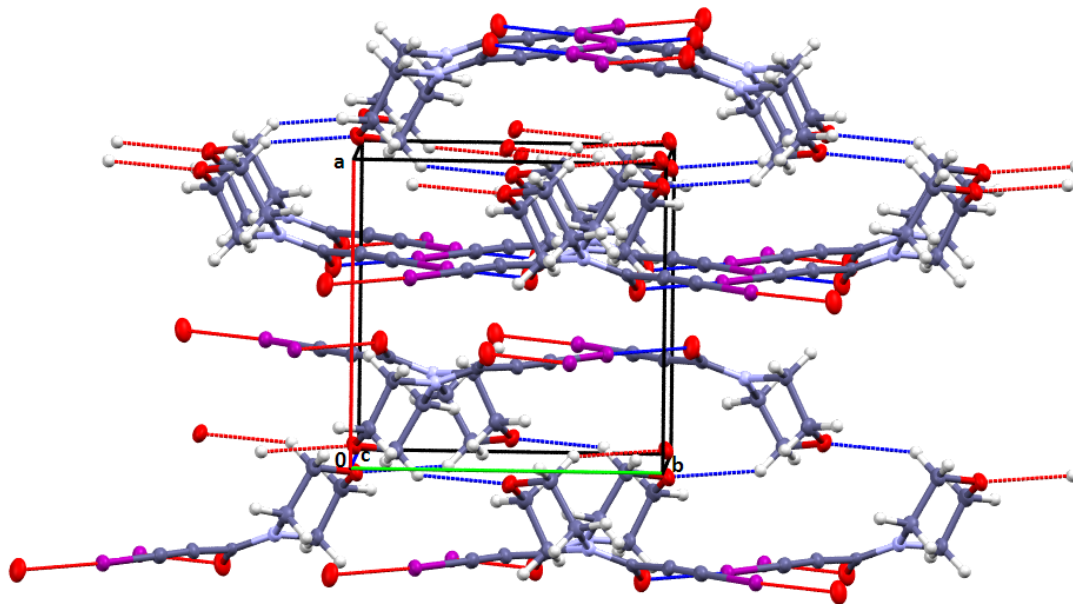

**Fig. S7** Packing diagram of **3d** (PK257) (PK254\_Abs\_Packing\_view approx down c\_Jan15.png). Hanging contacts are shown with a red dashed bond. For the sake of clarity, the packing within the given dimensions has not been completed.

**Table S1.** Selected bond lengths and angles in **3a–f**.

| Compound                   | <b>3a</b> | <b>3b</b> | <b>3c</b> | <b>3d</b> | <b>3e</b> | <b>3f</b> |
|----------------------------|-----------|-----------|-----------|-----------|-----------|-----------|
| <u>Bond lengths</u><br>(Å) |           |           |           |           |           |           |
| C1–O                       | 1.237(5)  | 1.233(6)  | 1.239(3)  | 1.236(3)  | 1.248(7)  | 1.245(4)  |
| C1–N                       | 1.337(5)  | 1.331(6)  | 1.336(4)  | 1.333(5)  | 1.330(8)  | 1.313(4)  |
| C1–C2                      | 1.451(7)  | 1.458(7)  | 1.450(5)  | 1.453(5)  | 1.445(9)  | 1.466(4)  |
| C2–C3                      | 1.184(7)  | 1.192(7)  | 1.199(5)  | 1.191(5)  | 1.211(8)  | 1.192(4)  |
| C3–I                       | 2.007(5)  | 1.999(5)  | 2.016(4)  | 2.010(4)  | 1.993(6)  | 2.001(3)  |
| <u>Bond angles</u> (°)     |           |           |           |           |           |           |
| C1–C2–C3                   | 175.6(5)  | 175.8(6)  | 173.5(3)  | 173.5(4)  | 170.2(6)  | 178.0(3)  |
| C2–C3–I                    | 177.0(4)  | 175.7(5)  | 179.1(3)  | 179.0(3)  | 176.7(5)  | 176.9(3)  |
|                            |           |           |           |           |           |           |
